# Supplementary material for: Anti-Acanthamoeba activity of a semi-synthetic mangostin derivative and its ability in removal of Acanthamoeba triangularis WU19001 on contact lens
Source: PeerJ. 2022 Dec 9;10:e14468. doi: 10.7717/peerj.14468 (PMC9745913; doi:10.7717/peerj.14468)
Supplement: Supplemental Information 1 [file peerj-10-14468-s001.xlsx]

## Sheet: Table 1
Screening of anti-Acanthamoeba activity and minimal inhibitory concentration
(MIC) of G. mangostana flower extract and chlorhexidine against A. triaugularis
trophozoites and cysts.
Anti-Acanthamoeba agent	Anti-Acanthamoeba activity at		MIC (mg/mL)
	a final concentration of 1 mg/mL
	Trophozoite	Cyst	Trophozoite	Cyst
Compound 1	+	+	0.128	0.064
Compound 2	+	+	0.512	1.024
Compound 3	+	+	0.512	1.024
Chlorhexidine	+	+	0.008	0.064
Trophozoites (1 mg/mL)
Anti-Acanthamoeba agent	Number of viable cells			% Inhibition				SD
	N1	N2	N3	X1	X2	X3	Average
Compound 1	20000	0	10000	86.9565	100	93.4783	93.4783	6.52174
Compound 2	20000	10000	10000	86.9565	93.4783	93.4783	91.3043	3.76533
Compound 3	0	10000	20000	100	93.4783	86.9565	93.4783	6.52174
Chlorhexidine	10000	10000	0	93.4783	93.4783	100	95.6522	3.76533
Control	150000	170000	140000	153333
Cysts (1 mg/mL)
Anti-Acanthamoeba agent	Number of viable cells			% Inhibition				SD
	N1	N2	N3	X1	X2	X3	Average
Compound 1	20000	0	10000	86.9565	100	93.4783	93.4783	6.52174
Compound 2	20000	10000	10000	86.9565	93.4783	93.4783	91.3043	3.76533
Compound 3	0	10000	20000	100	93.4783	86.9565	93.4783	6.52174
Chlorhexidine	10000	10000	0	93.4783	93.4783	100	95.6522	3.76533
Control	150000	170000	140000	153333
MIC value
MIC trophozoites	Number of cell viable			% inhibition
	N1	N2	N3	X1	X2	X3	Average	SD
Compound 1, 1.024 mg/mL	0	0	0	100	100	100	100	0
Compound 1, 0.512 mg/mL	0	0	0	100	100	100	100	0
Compound 1, 0.256 mg/mL	0	0	0	100	100	100	100	0
Compound 1, 0.128 mg/mL	10000	0	0	91.4286	100	100	97.1429	4.94872	MIC
Compound 1, 0.064 mg/mL	40000	20000	30000	65.7143	82.8571	74.2857	74.2857	8.57143
Compound 2, 1.024 mg/mL	0	0	0	100	100	100	100	0
Compound 2, 0.512 mg/mL	20000	0	0	82.8571	100	100	94.2857	9.89743	MIC
Compound 2, 0.256 mg/mL	80000	90000	50000	31.4286	22.8571	57.1429	37.1429	17.8429
Compound 2, 0.128 mg/mL	100000	110000	90000	14.2857	5.71429	22.8571	14.2857	8.57143
Compound 2, 0.064 mg/mL	100000	90000	80000	14.2857	22.8571	31.4286	22.8571	8.57143
Compound 3, 1.024 mg/mL	0	0	0	100	100	100	100	0
Compound 3, 0.512 mg/mL	10000	0	0	91.4286	100	100	97.1429	4.94872	MIC
Compound 3, 0.256 mg/mL	30000	40000	60000	74.2857	65.7143	48.5714	62.8571	13.0931
Compound 3, 0.128 mg/mL	80000	70000	50000	31.4286	40	57.1429	42.8571	13.0931
Compound 3, 0.064 mg/mL	110000	100000	100000	5.71429	14.2857	14.2857	11.4286	4.94872
CHX, 0.256 mg/mL	0	0	0	100	100	100	100	0
CHX, 0.128 mg/mL	0	0	0	100	100	100	100	0
CHX, 0.064 mg/mL	0	0	0	100	100	100	100	0
CHX, 0.032 mg/mL	0	0	0	100	100	100	100	0
CHX, 0.016 mg/mL	0	0	0	100	100	100	100	0
CHX, 0.008 mg/mL	0	0	0	100	100	100	100	0	MIC
CHX, 0.004 mg/mL	30000	20000	40000	74.2857	82.8571	65.7143	74.2857	8.57143
Control	100000	120000	130000	116667
MIC cyst	Number of cell viable			% inhibition
	N1	N2	N3	X1	X2	X3	Average	SD
Compound 1, 0.512 mg/mL	0	0	0	100	100	100	100	0
Compound 1, 0.256 mg/mL	0	0	0	100	100	100	100	0
Compound 1, 0.128 mg/mL	0	0	0	100	100	100	100	0
Compound 1, 0.064 mg/mL	10000	0	0	92.1053	100	100	97.3684	4.55803	MIC
Compound 1, 0.032 mg/mL	50000	60000	30000	60.5263	52.6316	76.3158	63.1579	12.0594
Compound 2, 1.024 mg/mL	0	0	0	100	100	100	100	0	MIC
Compound 2, 0.512 mg/mL	30000	40000	60000	76.3158	68.4211	52.6316	65.7895	12.0594
Compound 2, 0.256 mg/mL	70000	90000	80000	44.7368	28.9474	36.8421	36.8421	7.89474
Compound 2, 0.128 mg/mL	120000	90000	80000	5.26316	28.9474	36.8421	23.6842	16.4342
Compound 2, 0.064 mg/mL	100000	120000	90000	21.0526	5.26316	28.9474	18.4211	12.0594
Compound 3, 1.024 mg/mL	10000	0	0	92.1053	100	100	97.3684	4.55803	MIC
Compound 3, 0.512 mg/mL	50000	70000	40000	60.5263	44.7368	68.4211	57.8947	12.0594
Compound 3, 0.256 mg/mL	70000	90000	100000	44.7368	28.9474	21.0526	31.5789	12.0594
Compound 3, 0.128 mg/mL	90000	90000	110000	28.9474	28.9474	13.1579	23.6842	9.11606
Compound 3, 0.064 mg/mL	110000	100000	90000	13.1579	21.0526	28.9474	21.0526	7.89474
CHX, 0.256 mg/mL	0	0	0	100	100	100	100	0
CHX, 0.128 mg/mL	0	0	0	100	100	100	100	0
CHX, 0.064 mg/mL	20000	0	0	84.2105	100	100	94.7368	9.11606	MIC
CHX, 0.032 mg/mL	30000	10000	20000	76.3158	92.1053	84.2105	84.2105	7.89474
CHX, 0.016 mg/mL	50000	40000	30000	60.5263	68.4211	76.3158	68.4211	7.89474
CHX, 0.008 mg/mL	80000	80000	50000	36.8421	36.8421	60.5263	44.7368	13.6741
Control	150000	120000	110000	126667

## Sheet: Anti-Encystation
Anti-encystation
Before SDS
Agents	1	2	3
MIC Compound 1	29	27	35
1/2 x MIC Compound 1	30	34	26
1/4 x MIC Compound 1	24	20	17
1/8 x MIC Compound 1	25	31	35
1/16 x MIC Compound 1	31	30	32
1/32 x MIC Compound 1	37	30	35
PMSF	28	31	29
Control	30	31	35
Before SDS
Agents	1	2	3
MIC Compound 1	290000	270000	350000
1/2 x MIC Compound 1	300000	300000	260000
1/4 x MIC Compound 1	320000	350000	300000
1/8 x MIC Compound 1	350000	330000	320000
1/16 x MIC Compound 1	310000	300000	320000
1/32 x MIC Compound 1	370000	300000	350000
PMSF	280000	310000	290000
Control	300000	310000	350000
Agents	1	2	3	Average
MIC Compound 1	5.4624	5.43136	5.54407	5.47928
1/2 x MIC Compound 1	5.47712	5.47712	5.41497	5.45641
1/4 x MIC Compound 1	5.50515	5.54407	5.47712	5.50878
1/8 x MIC Compound 1	5.54407	5.51851	5.50515	5.52258
1/16 x MIC Compound 1	5.49136	5.47712	5.50515	5.49121
1/32 x MIC Compound 1	5.5682	5.47712	5.54407	5.5298
PMSF	5.44716	5.49136	5.4624	5.46697
Control	5.47712	5.49136	5.54407	5.50418
After SDS
Agents	1	2	3
MIC Compound 1	140000	170000	180000
1/2 x MIC Compound 1	120000	120000	110000
1/4 x MIC Compound 1	140000	140000	160000
1/8 x MIC Compound 1	190000	130000	150000
1/16 x MIC Compound 1	100000	110000	90000
1/32 x MIC Compound 1	80000	140000	170000
PMSF	0	0	0
Control	310000	320000	320000
Agents	1	2	3
MIC Compound 1	5.14613	5.23045	5.25527
1/2 x MIC Compound 1	5.07918	5.07918	5.04139
1/4 x MIC Compound 1	5.14613	5.14613	5.20412
1/8 x MIC Compound 1	5.27875	5.11394	5.17609
1/16 x MIC Compound 1	5	5.04139	4.95424
1/32 x MIC Compound 1	4.90309	5.14613	5.23045
PMSF	0	0	0
Control	5.49136	5.50515	5.50515
% anti-Encystation
Agents	1	2	3	Average	SD
MIC Compound 1	6.08016	4.54125	4.08821	4.9032	1.04414
1/2 x MIC Compound 1	6.91342	6.91342	7.60597	7.14427	0.399846	1/2 x MIC C1
1/4 x MIC Compound 1	6.58316	6.58316	5.53044	6.23225	0.607787	1/4 x MIC C1
1/8 x MIC Compound 1	4.41503	7.39933	6.27399	6.02945	1.5071	1/8 x MIC C1
1/16 x MIC Compound 1	8.9454	8.1916	9.77869	8.9719	0.793874	1/16 x MIC C1
1/32 x MIC Compound 1	11.3333	6.93821	5.41336	7.89495	3.07373	1/32 x MIC C1
PMSF	100	100	100	100	0	10 mM PMSF
Control	0.23295	-0.017556	-0.017556	0.0659459	0.144629	Control

## Sheet: Excystation
Excystation rate (%)
Before SDS								% Excystation
Agents	1	2	3					Agents	1	2	3	Average	SD
1/2 x MIC Compound 1	320000	340000	320000	326667				1/2 x MIC	29.5918	26.5306	17.3469	24.4898	6.37245
1/4 x MIC Compound 1	330000	340000	350000	340000				1/4 x MIC	16.6667	25.4902	28.4314	23.5294	6.12255
1/8 x MIC Compound 1	310000	320000	340000	323333				1/8 x MIC	35.0515	28.866	19.5876	27.8351	7.78333
1/16 x MIC Compound 1	320000	310000	290000	306667				1/16 x MIC	67.3913	60.8696	57.6087	61.9565	4.98106
1/32 x MIC Compound 1	280000	320000	310000	303333				1/32 x MIC	76.9231	70.3297	73.6264	73.6264	3.2967
1/64 x MIC Compound 1	290000	340000	350000	326667				1/64 x MIC	78.5714	81.6327	81.6327	80.6122	1.7674
1/128 x MIC Compound 1	350000	280000	320000	316667				1/128 x MIC	90.5263	84.2105	93.6842	89.4737	4.82376
Control	320000	370000	290000	326667				Control	26.5306	29.5918	35.7143	30.6122	4.6761
PMSF	310000	350000	350000	336667				10 mM PMSF	4.9505	4.9505	-0.990099	2.9703	3.4298
Agents	1	2	3	Average
1/2 x MIC Compound 1	5.50515	5.53148	5.50515	5.51393
1/4 x MIC Compound 1	5.51851	5.53148	5.54407	5.53135
1/8 x MIC Compound 1	5.49136	5.50515	5.53148	5.50933
1/16 x MIC Compound 1	5.50515	5.49136	5.4624	5.4863
1/32 x MIC Compound 1	5.44716	5.50515	5.49136	5.48122
1/64 x MIC Compound 1	5.4624	5.53148	5.54407	5.51265
1/128 x MIC Compound 1	5.54407	5.44716	5.50515	5.49879
Control	5.50515	5.5682	5.4624	5.51192
PMSF	5.49136	5.54407	5.54407	5.5265
Agents	1	2	3
1/2 x MIC Compound 1	230000	240000	270000
1/4 x MIC Compound 1	270000	240000	230000
1/8 x MIC Compound 1	210000	230000	260000
1/16 x MIC Compound 1	100000	120000	130000
1/32 x MIC Compound 1	70000	90000	80000
1/64 x MIC Compound 1	70000	60000	60000
1/128 x MIC Compound 1	30000	50000	20000
Control	240000	230000	210000
PMSF	320000	320000	340000
Agents	1	2	3
1/2 x MIC Compound 1	5.36173	5.38021	5.43136
1/4 x MIC Compound 1	5.43136	5.38021	5.36173
1/8 x MIC Compound 1	5.32222	5.36173	5.41497
1/16 x MIC Compound 1	5	5.07918	5.11394
1/32 x MIC Compound 1	4.8451	4.95424	4.90309
1/64 x MIC Compound 1	4.8451	4.77815	4.77815
1/128 x MIC Compound 1	4.47712	4.69897	4.30103
Control	5.38021	5.36173	5.32222
PMSF	5.50515	5.50515	5.53148

## Sheet: removal
Trophozoites
Agent	Numbers of Acanthamoeba trophozoites (1x104 cell/mL)				SD
	1	2	3	Average
Control	30	32	29	30.3333	1.52753
Chlorhexidine	13	13	10	12	1.73205
MPD 1	2	2	4	2.66667	1.1547
MPD 2	4	5	6	5	1
Compound 1	2	1	2	1.66667	0.57735
MPD 1 = multi-purpose disinfecting brand 1solutions
MPD 2 = multi-purpose disinfecting brand 2solutions
Cysts
Agent	Numbers of Acanthamoeba cysts (1x104 cell/mL)				SD
	1	2	3	Average
Control	17	17	14	16	1.73205
Chlorhexidine	7	8	8	7.66667	0.57735
MPD 1	3	2	2	2.33333	0.57735
MPD 2	2	2	2	2	0
Compound 1	1	2	2	1.66667	0.57735
MPD 1 = multi-purpose disinfecting brand 1solutions
MPD 2 = multi-purpose disinfecting brand 2solutions
